# Supplementary material for: Functional Relevance of Citrulline in the Vegetative Tissues of Watermelon During Abiotic Stresses
Source: Front Plant Sci. 2020 May 5;11:512. doi: 10.3389/fpls.2020.00512 (PMC7216109; doi:10.3389/fpls.2020.00512)
Supplement: Supplementary file 15 [file Table_1.XLSX]

## Sheet: Sheet1
Supplementary Table S1. Primers used for the real time quantitative PCR analysis.
Gene Name	Gene ID	Forward Primer	Reverse Primer
Actin	ClCG02G000680	CCATGTATGTTGCCATCCAG	GGATAGCATGGGGTAGAGCA
α-tubulin5	ClCG02G024360	GATGGTATGATGCCCAGTGA	CCGGTAGGCTCCAGTTCTAA
N-acetylornithine Aminotransferase (AAT)	ClCG09G003180	CTC GAA GGG CGA GAG TAT TTA G	GTA TTC GCC TGC TCT GTT ACT
N-acetylornithine deacetylase (AOD2)	ClCG09G012030	TTG TCT CCT TCG TTG GAA GTC	GTC CCA CGA CCT CTT AGT TTA TC
N-acetylornithine deacetylase (AOD3)	ClCG09G012020	AGG GAG TTT GCC GGT TAT TC	CAT TCT GGG CAT GGT ATG TAT CT
Argininosuccinate lyase (ASL2)	ClCG11G014580	CGT TCC GGG CTA TAC ACA TTT A	GAC AAA CGA CCA GCA TCT CT
Argininosuccinate lyase (ASL1)	ClCG08G011660	GAT GAG ATC GAG AGG CGT ATT C	GCT CGC CAA TCA AAT CAG TAA G
Arginosuccinate synthase (ASS1)	ClCG06G017780	CAG GAG GAA CCA TCC TAT TCA C	ACA CCA GCT CGG CAT ATT T
Carbamoyl phosphate synthase (CPS2)	ClCG09G021680	ATT TGA GGA GGA TGG CTC TTG	CTC GCC TTC AGG CTC TTT ATT
Ornithine carbamoyl transferase (OTC)	ClCG05G018820	CTA CCT ACG GGT CGT CAT ACT A	TGT AAT CCG TCA GGC CAT TTA T
Ornithine decarboxylase (ODC)	ClCG08G013990	TTC CGG CAA ACC CAA AGA	GAG GAG GCC ATG TTG AGA AA
Ornithine cyclodeaminase (OCD)	ClCG05G008460	GGC ACT GCC TTG ACT CTT TA	CAC CAT AAC CAT GAC CCT ACT ATC
BestKeeper analysis of expression stability of reference genes
Gene ID	Gene annotation	PCR efficiency	Min CT	Max CT	Std Dev	No Template
ClCG02G000680	Actin	0.97	20.24	21.12	0.23	Not detected
ClCG02G024360	α-tubulin5	0.95	21.14	22.2	0.41	N.d.
ClCG05G018710	Clathrin adaptor complex subunit*	0.91	24.74	27.16	0.83	N.d.
ClCG02G012920	Yellow-leaf-specific proein 8*	0.93	25.73	27.81	1.27	N.d.
* The primer sequences are described in Kong et al (2014)

## Sheet: Sheet2
BestKeeper analysis of expression stability of reference genes
